# Supplementary material
Source: publisher figshare collection journal article supplement (https://wiley.figshare.com/articles/dataset/_/3554718)
Supplement: Supplementary file 2 [file 1 › appendix-H.htm]

Ecological Archives E093-238-A8


*Ecological Archives* E093-238-A8

Anne Chao, Lou Jost. 2012. Coverage-based rarefaction and extrapolation: standardizing samples by completeness rather than size. *Ecology* 93:2533–2547. http://dx.doi.org/10.1890/11-1952.1

Appendix H. Some basic theoretical properties of coverage-based species accumulation curves.

> View / download PDF.


---

[Back to E093-238]
